# Supplementary material for: Silicon Promotes Agronomic Performance in Brassica napus Cultivated under Field Conditions with Two Nitrogen Fertilizer Inputs
Source: PubMed Central journal article supplement (PMC6571727; doi:10.3390/plants8050137), 2019-05-22
Supplement: plants-08-00137-s001.pdf [file plants-08-00137-s001.pdf]

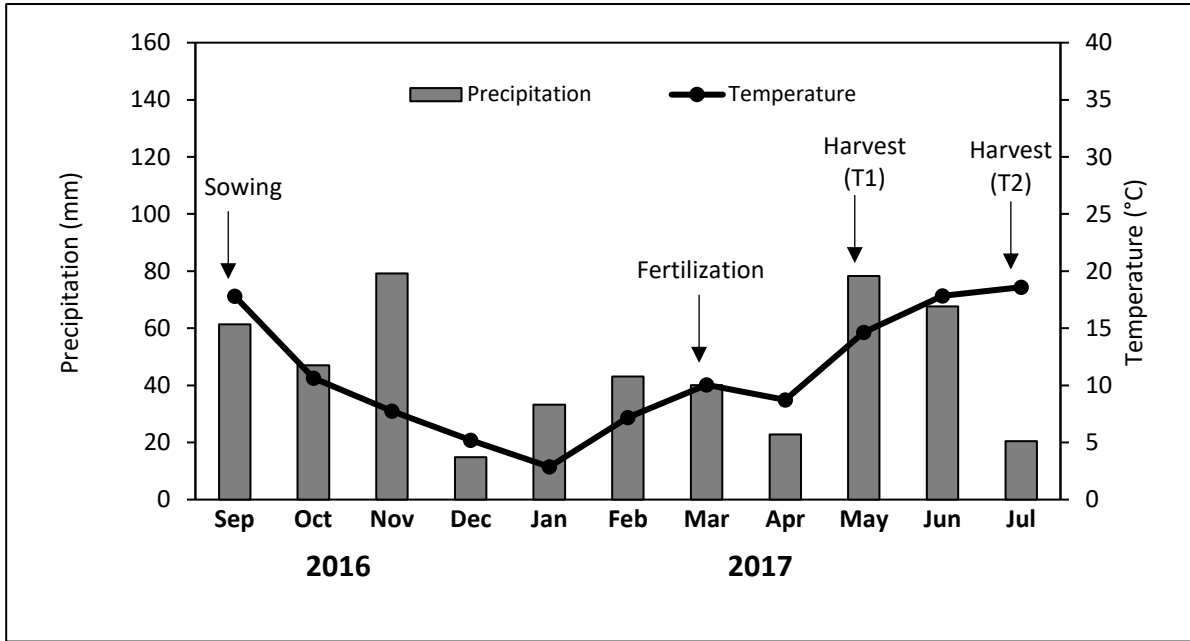

**Figure S1.** Mean monthly temperature and precipitation recorded at the meteorological station during the 2016–2017 growth season. Arrows indicate main experimental steps.

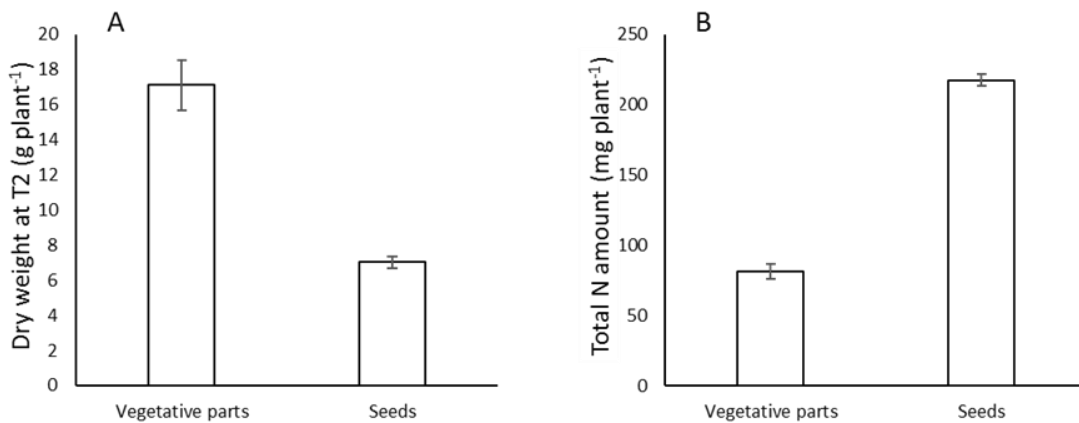

**Figure S2.** Total dry weight (**A**) and total nitrogen amount (**B**) of vegetative parts and seeds of rapeseed plants cultivated without N supply and harvested at T2 (G5 stage). Values correspond to the mean  $\pm$  SE for  $n = 3$ .

**Table S1.** Macro (**grey**) and microelement (**white**) concentrations in mature seeds from rapeseed plants harvested at T2 (G5 stage). Plants were cultivated in lysimeter with 60 (60 N) or 160 kg of N ha<sup>-1</sup> (160 N) and supplied with or without Si (12 Kg of Si ha<sup>-1</sup>; 60 N + Si, 160 N + Si). Values represent the mean  $\pm$  SE for  $n = 3$ .

| Nutrient                 | 60 N             | 60 N + Si        | 160 N            | 160 N + Si       |
|--------------------------|------------------|------------------|------------------|------------------|
| Ca (mg g <sup>-1</sup> ) | 3.89 $\pm$ 0.08  | 3.87 $\pm$ 0.18  | 3.61 $\pm$ 0.19  | 3.52 $\pm$ 0.21  |
| K (mg g <sup>-1</sup> )  | 5.61 $\pm$ 0.39  | 5.34 $\pm$ 0.20  | 5.72 $\pm$ 0.04  | 5.61 $\pm$ 0.15  |
| Mg (mg g <sup>-1</sup> ) | 1.83 $\pm$ 0.07  | 1.74 $\pm$ 0.07  | 1.82 $\pm$ 0.06  | 1.72 $\pm$ 0.04  |
| P (mg g <sup>-1</sup> )  | 4.12 $\pm$ 0.13  | 3.93 $\pm$ 0.20  | 3.62 $\pm$ 0.17  | 3.54 $\pm$ 0.09  |
| S (mg g <sup>-1</sup> )  | 3.04 $\pm$ 0.05  | 2.86 $\pm$ 0.08  | 3.45 $\pm$ 0.12  | 3.17 $\pm$ 0.11  |
| B (mg g <sup>-1</sup> )  | 11.22 $\pm$ 0.25 | 10.84 $\pm$ 0.14 | 11.73 $\pm$ 0.33 | 11.30 $\pm$ 0.55 |
| Cu (mg g <sup>-1</sup> ) | 2.61 $\pm$ 0.07  | 2.58 $\pm$ 0.06  | 2.90 $\pm$ 0.35  | 2.79 $\pm$ 0.17  |
| Mn (mg g <sup>-1</sup> ) | 25.46 $\pm$ 0.61 | 25.40 $\pm$ 1.16 | 27.26 $\pm$ 0.58 | 26.10 $\pm$ 0.61 |
| Mo (mg g <sup>-1</sup> ) | 0.38 $\pm$ 0.06  | 0.40 $\pm$ 0.02  | 0.35 $\pm$ 0.01  | 0.35 $\pm$ 0.02  |
| Se (mg g <sup>-1</sup> ) | 37.20 $\pm$ 0.66 | 30.21 $\pm$ 4.27 | 25.80 $\pm$ 3.37 | 29.90 $\pm$ 1.85 |
| Zn (mg g <sup>-1</sup> ) | 28.77 $\pm$ 0.64 | 27.89 $\pm$ 0.66 | 36.43 $\pm$ 5.33 | 33.41 $\pm$ 4.13 |
